# Supplementary material for: A pro-diabetogenic mtDNA polymorphism in the mitochondrial-derived peptide, MOTS-c
Source: Aging (Albany NY). 2021 Jan 19;13(2):1692–717. doi: 10.18632/aging.202529 (PMC7880332; doi:10.18632/aging.202529)
Supplement: Supplementary Figures [file aging-13-202529-s001.pdf]

SUPPLEMENTARY FIGURES

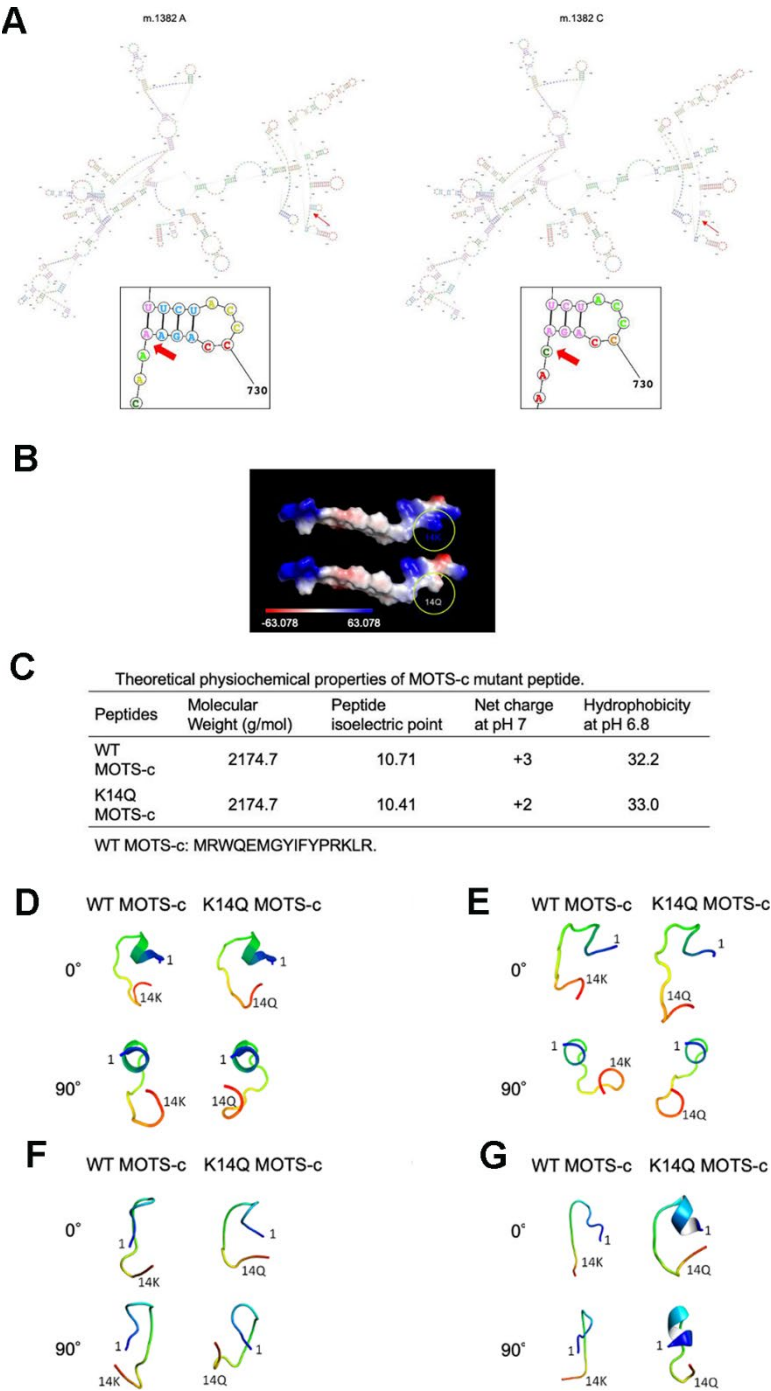

**Supplementary Figure 1.** The impact of m.1382 A>C polymorphism in the structure of 12S rRNA and MOTS-c peptide (A) The predicted 12S rRNA structure by m.1382 A>C polymorphism by RNA structure (<https://rna.urmc.rochester.edu/RNAstructureWeb/Servers/Predict1/Predict1.html>). The box is the enlarged view of the pointed with arrow. (B) The electrostatic potential map of the the MOTS-c and the K14Q MOTS-c by PyMOL. (C) Theoretical physiochemical properties of MOTS-c mutant peptide. (D, E) The models were obtained via the program PEP-FOLD3 (model 1). The left two structures show the model of MOTS-c 14K peptide. The right two structures show the model of MOTS-c 14Q peptide. The lower view is generated by rotating peptide structure 90° around the y-axis from upper view. (F, G) The 3D structure of MOTS-c 14K and 14Q models obtained via the program I-TASSER (model 2). The figure is generated by Molmil viewer (<https://pdj.org/molmil/>).

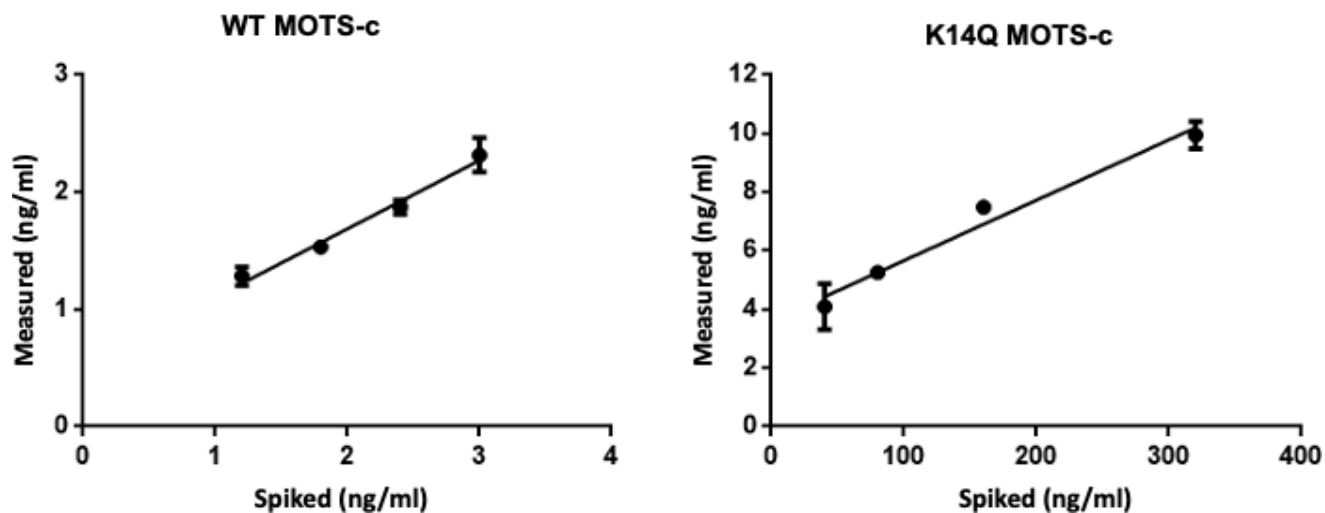

**Supplementary Figure 2. Recovery of WT and K14Q MOTS-c synthetic peptides.** Purchased human plasma was spiked with various concentrations of WT MOTS-c peptide (1.2, 1.8, 2.4 and 3.0 ng/ml) and K14Q MOTS-c peptide (40, 80, 160 and 320 ng/ml). Spiked WT and K14Q MOTS-c peptides were measured by MOTS-c WT ELISA described in materials and methods. Based on spiked and measured levels of MOTS-c K14Q, we calculated a conversion factor to convert MOTS-c levels to K14Q levels for human subjects carrying K14Q genotype measured by MOTS-c WT ELISA.

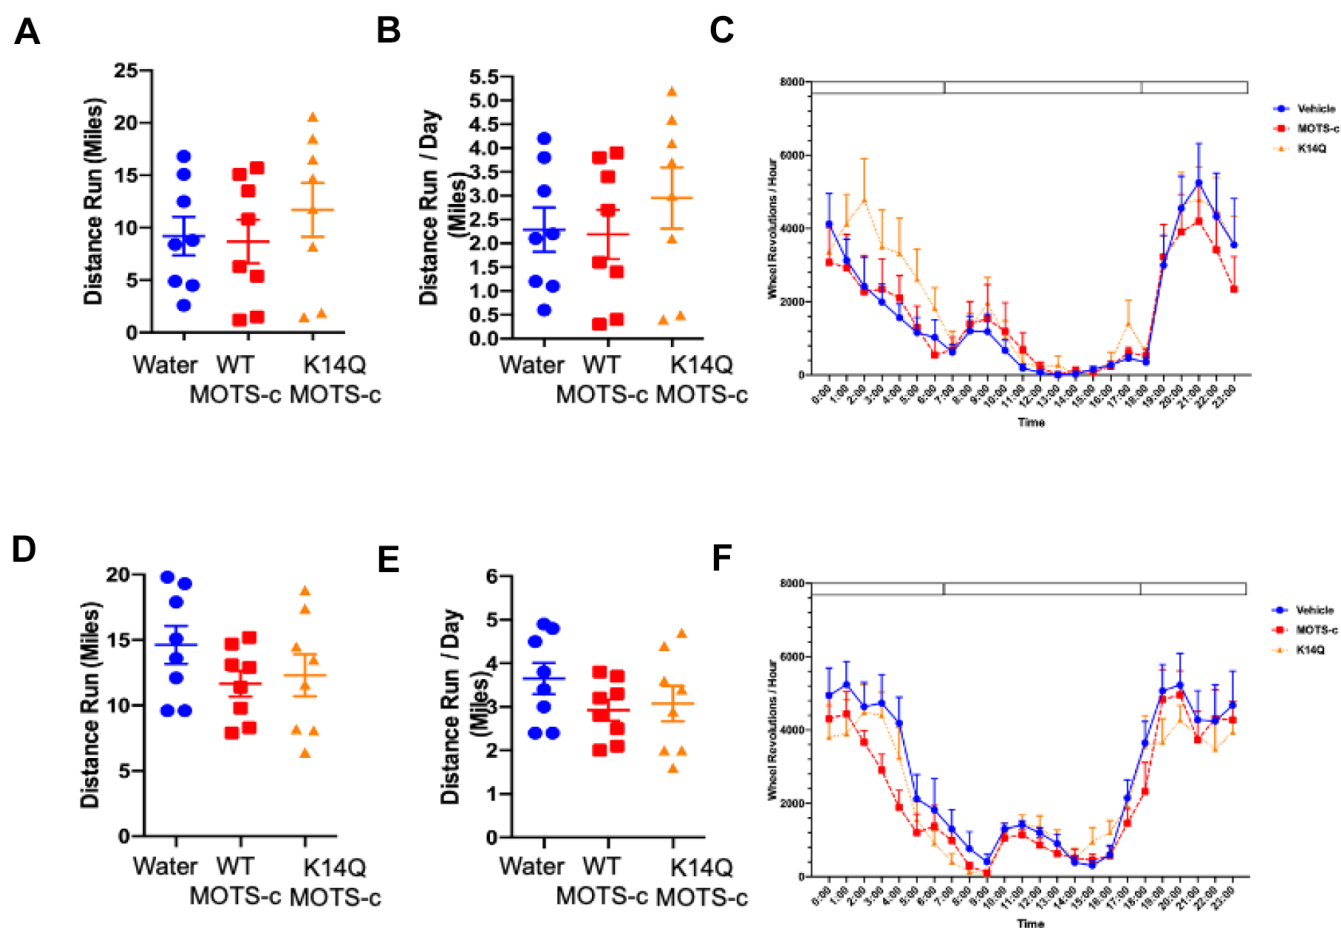

**Supplementary Figure 3. The effects of MOTS-c on voluntary wheel running activity.** (A) total distance run, (B) total distance run per day, and (C) hourly running activity in males. (D) total distance run, (E) total distance run per day, and (F) hourly running activity in females.
